## CORRECTION

# Thymic stromal lymphopoietin: an immune cytokine gene associated with the metabolic syndrome and blood pressure in severe obesity

V. TURCOT, L. BOUCHARD, G. FAUCHER, V. GARNEAU, A. TCHERNOF, Y. DESHAIES, L. PÉRUSSE, S. MARCEAU, S. BIRON, O. LESCELLEUR, L. BIERTHO and M.-C. VOHL

Volume 123 (2012), pp. 99–109

The published values of the fasting glucose concentrations and TAGs in the ‘Women’ column of Table 1 were incorrect. The correct values are shown below in Table 1.

**Table 1** Characteristics of the subjects for *TSLP* mRNA level measurement using qRT-PCR

Values are means  $\pm$  S.D. or numbers

| Phenotype                    | Men              | Women            |
|------------------------------|------------------|------------------|
| Subjects ( <i>n</i> )        | 23               | 107              |
| Smokers ( <i>n</i> )         | 0                | 0                |
| Menopausal ( <i>n</i> )      | —                | 0                |
| Age (years)                  | 32.3 $\pm$ 8.8   | 35.8 $\pm$ 7.8   |
| BMI (kg/m <sup>2</sup> )     | 57.2 $\pm$ 12.8  | 51.4 $\pm$ 9.5   |
| Weight (kg)                  | 181.2 $\pm$ 43.0 | 133.6 $\pm$ 26.9 |
| Waist circumference (cm)     | 158.1 $\pm$ 19.4 | 129.8 $\pm$ 16.3 |
| Type 2 diabetes ( <i>n</i> ) | 0                | 0                |
| MetS ( <i>n</i> )            | 12               | 42               |
| Fasting glucose (mmol/l)     | 5.67 $\pm$ 0.84  | 5.14 $\pm$ 0.77  |
| TAGs (mmol/l)                | 1.86 $\pm$ 1.34  | 1.57 $\pm$ 0.99  |
| HDL-cholesterol (mmol/l)     | 1.11 $\pm$ 0.21  | 1.37 $\pm$ 0.31  |
| SBP (mmHg)                   | 143.9 $\pm$ 20.1 | 137.9 $\pm$ 17.0 |
| DBP (mmHg)                   | 85.7 $\pm$ 13.7  | 84.8 $\pm$ 11.0  |
